# Supplementary material for: Tillage-induced short-term soil organic matter turnover and respiration
Source: Copernicus journal article supplement (doi:10.5194/soil-2015-91), 2016-01-19
Supplement: Supplementary file [file soil-2015-91-AC1-supplement.zip]

# Tillage-induced short-term soil organic matter turnover and respiration

S. R. Fiedler<sup>1</sup>, P. Leinweber<sup>1</sup>, G. Jurasinski<sup>1</sup>, K.-U. Eckhardt<sup>1</sup>, S. Glatzel<sup>1,\*</sup>

[1]{University of Rostock, Faculty of Agricultural and Environmental Sciences, Rostock, Germany}

[\*]{now at: University of Vienna, Department of Geography and Regional Research, Vienna, Austria}

Correspondence to: S. R. Fiedler (sebastian.fiedler@uni-rostock.de)

## Abstract

Tillage induces decomposition and mineralisation of soil organic matter (SOM) by the disruption of macroaggregates and may increase soil CO<sub>2</sub> efflux by respiration, but these processes are not well understood at the molecular level. We sampled three treatments (mineral fertiliser = MF, biogas digestate = BD, unfertilised control = CL) of a stagnic luvisol a few hours before and directly after tillage, and four days later from a harvested maize field in Northern Germany and investigated these samples by pyrolysis-field ionization mass spectrometry (Py-FIMS) and hot-water extraction. Before tillage, the Py-FIMS mass spectra revealed distinct differences in relative ion intensities of undisturbed soil compared to BD most likely attributable to the cattle manure used for the biogas feedstock and to relative enrichments during anaerobic fermentation. After tillage, the CO<sub>2</sub> effluxes were increased in all treatments, but this increase was less pronounced in BD. We explain this by a restricted availability of readily biodegradable carbon compounds and, possibly an inhibitory effect of sterols from digestates. Despite high spatial variability, significant changes in SOM composition were observed following tillage. In particular, lignin decomposition and increased proportions of N-containing compounds were detected in BD. In MF, lipid proportions increased at the expense of ammonia, ammonium, carbohydrates and

29 peptides, indicating an enhanced microbial activity. SOM composition in CL was  
30 unaffected by tillage. In summary, combining all analyses data provided strong  
31 evidence for significant short-term SOM changes due to tillage in fertilised soils.

32

## 33 **1 Introduction**

34 The influence of tillage on soil organic matter (SOM) is generally well understood.  
35 Tillage stimulates decomposition of SOM resulting in increased CO<sub>2</sub> efflux (Alvarez et  
36 al., 2001; Dao, 1998; Liu et al., 2006), mostly by aeration and by the disruption of SOM  
37 that had been protected in macro-aggregates (Grandy and Robertson, 2007; Six et al.,  
38 1999). In the long-term, tillage promotes a shift of chemical structure and age towards  
39 more recent SOM (Grandy and Neff, 2008) due to both, the mineralisation of older  
40 SOM and the decomposition of recent plant residues (Balesdent et al., 1990). In  
41 addition, tilled soils contain lower amounts of readily biodegradable (hereinafter  
42 referred to as “labile”) organic matter (Balota et al., 2003) and have an increased  
43 potential for mineralisation and nitrification (Doran, 1980) which implies a lower  
44 potential to immobilise mineral N (Follett, R. F. and Schimel, D. S., 1989; Schulten and  
45 Hempfling, 1992). However, the immediate, short-term effects of tillage events on  
46 SOM are almost unknown.

47 Research on short term effects of tillage on SOM has focussed largely on CO<sub>2</sub> efflux:  
48 several studies recorded the dynamics of CO<sub>2</sub> efflux immediately after tillage (cf., Table  
49 5 in Fiedler et al., 2015) and some basic models have been developed that describe  
50 correlations between CO<sub>2</sub> efflux and the turnover of soil organic carbon (SOC) after  
51 tillage by first order kinetics (La Scala et al., 2008). Admittedly, SOC accounts for the  
52 majority of SOM, but these correlations do not causally explain which SOC constituents  
53 are mineralised. Furthermore, SOM-CO<sub>2</sub>-efflux-relationships are influenced by the type  
54 of soil amendment (Fiedler et al., 2015).

55 Biogas digestate is a relatively new type of soil amendment, and its long-term stability  
56 in soil is still under debate as recently reviewed by Möller (2015). Consequently, it is  
57 not clear how long-term application of biogas digestates would alter the composition of  
58 SOM, and tillage effects on short-term SOM turnover in biogas digestate-amended soils

59 are almost unstudied. Even short-term changes of SOM may have strong effects on  
60 nutrient availability and plant productivity. A better understanding of the immediate  
61 impacts of tillage on SOM and its turnover may help to avoid adverse effects for plant  
62 growth (Doran, 2002; Franzluebbers et al., 1994; Mijangos et al., 2006).

63 In general, detecting changes in the molecular-chemical composition of SOM in time  
64 periods as short as days, requires extremely sensitive methods. Pyrolysis-field  
65 ionization mass spectrometry (Py-FIMS) is a very sensitive method and has been  
66 applied successfully to investigate differences in the chemical composition of SOM  
67 under different fertiliser treatments like mineral NPK-fertiliser or farmyard manure  
68 (Jandl et al., 2004; Leinweber et al., 2008b; Schmidt et al., 2000). Even very small  
69 alterations in the composition and stability of dissolved organic matter – a very reactive  
70 part of SOM – during storage in the fridge (Schulten et al., 2008) or diurnal cycles of  
71 CO<sub>2</sub>-assimilation and respiration (Kuzyakov et al., 2003; Melnitchouck et al., 2005;  
72 Leinweber et al., 2008a) have been detected and resolved by multivariate statistics of  
73 mass-spectrometric fingerprints. Furthermore, Py-FIMS of bulk SOM revealed  
74 alterations in laboratory incubation experiments and linked these to respiration and  
75 enzyme activities (Leinweber et al., 2008b). However, it is unclear if the method is  
76 sensitive enough to detect tillage-induced SOM alterations under various fertilisation  
77 regimes and analyse its influence on CO<sub>2</sub> efflux at the field scale where spatial  
78 heterogeneity may interfere with the temporal dynamics much more than in the above  
79 cited laboratory studies.

80 Hot-water extraction is a relatively simple method to release labile SOM and to estimate  
81 how much of soil C and N can be easily utilised by microorganisms (Leinweber et al.,  
82 1995). These labile pools have been suggested to be an important indicator of short-  
83 term changes in SOM quality due to soil management (Haynes, 2005). Furthermore, a  
84 significant proportion of hot water-extracted organic matter originates from microbial  
85 biomass. Thus, this approach is a potential indicator for changes in microbial biomass  
86 or activity (Sparling et al., 1998), which may reflect sources of CO<sub>2</sub> efflux following  
87 tillage.

88 Here, we investigate (1) short-term effects of tillage on SOM composition and (2)

89 potential relationships between decomposable SOM fractions and measured CO<sub>2</sub> efflux  
90 under the impact of different soil amendments by combining Py-FIMS with CO<sub>2</sub> efflux  
91 measurements.

92

## 93 **2 Materials and methods**

### 94 **2.1 Study site**

95 The study site is located in northeast Germany in the ground moraine of the  
96 Weichselian glacial period at 53° 48' 35" N and 12° 4' 20" E (elevation 10 m) within a  
97 gently rolling relief. The soil is a stagnic luvisol (IUSS Working Group WRB, 2006)  
98 with sandy loam texture (sand = 63 %, silt = 26 %, clay = 11 %) overlying bedrock of  
99 till. The top soil (0-30 cm) has an organic carbon content of 1.16% (standard deviation  
100 (SD) = 0.1,  $n = 3$ , measured with CN-analyser "vario MAX", Elementar, Hanau,  
101 Germany), pH of 7.4 (SD = 0.9,  $n = 3$ , measured in H<sub>2</sub>O with pH meter "CX-401",  
102 Elmetron, Zabrze, Poland) and bulk density of 1.51 g cm<sup>-3</sup> (SD = 0.08,  $n = 3$ , measured  
103 on 250 cm<sup>3</sup> soil cores). The climate is characterized by maritime influence with annual  
104 averages of 8.8° C temperature and 557 mm total precipitation for the 30-year-period  
105 from 1985 until 2014 (LFA 2015). The experiment was conducted on a field which has  
106 been cultivated with maize (*Zea Mays* L.), cultivar "Atletico", as feedstock for a biogas  
107 plant. The previous crops were winter wheat (*Triticum aestivum* L.) followed by maize.

108 We compared three fertiliser treatments: CL – without fertiliser (control), MF – with  
109 mineral fertiliser, and BD – with biogas digestate. The size of the three experimental  
110 plots was 6 by 30 m each. In both fertilised treatments, equal overall amounts of plant-  
111 available N were applied (160 kg ha<sup>-1</sup>) on 26 April 2012. The mineral fertiliser calcium  
112 ammonium nitrate was top-dressed whereas the biogas digestate was injected into the  
113 soil down to 10 cm depth with a track width of 25 cm. Following the research facility  
114 for agriculture and fisheries (LFA) of the federal state of Mecklenburg-Western  
115 Pomerania, Germany (personal communication, 2014), a mineral fertiliser equivalent of  
116 70% of total N in the biogas digestates (229 kg N ha<sup>-1</sup>) was assumed. The biogas  
117 digestate originated from the anaerobic fermentation of 91% cattle slurry, 7% rye groats

118 and 2% maize silage; it had pH 8.1, and 3.8% C, 0.5% total N and 0.3% NH<sub>4</sub>-N in  
119 original matter.

120 Sixteen days after harvest of the maize (8 October 2012), the field site was first tilled  
121 with a disc harrow “Väderstad Carrier 300” down to 10 cm depth (24 October, about  
122 9.15 a.m.) and then with a reversible mouldboard plough “Överum CX 490” down to 30  
123 cm depth on the subsequent day (25 October, about 11.30 a.m.).

## 124 **2.2 CO<sub>2</sub> concentration measurement and estimation of CO<sub>2</sub> efflux**

125 For measuring CO<sub>2</sub> exchange we permanently installed three replicate collars in each  
126 treatment after fertilisation in spring which were removed for tillage and inserted back  
127 afterwards. The adjacent collars shared distances of 1m. The collars had a total height of  
128 15 cm and were installed into the soil down to 12 cm depth. The CO<sub>2</sub> concentration  
129 measurements were performed with two LI-COR (Inc., Lincoln, NE, USA) LI-820  
130 infrared gas analysers, each connected to a non-steady state closed chamber that was  
131 placed on the collars during measurements. The chambers had a square area of 0.62 m<sup>2</sup>  
132 and a height of 0.55 m, resulting in a chamber volume of 0.34 m<sup>3</sup> and were equipped  
133 with small fans (80 x 80 x 25 mm, 3000 rpm, 68 m<sup>3</sup> h<sup>-1</sup>) in order to mix and homogenize  
134 the air inside the chambers. Due to the successive measurement of the replicates in each  
135 treatment, we obtained pseudo-replications.

136 During chamber placement, we recorded CO<sub>2</sub> concentrations in the chamber headspace  
137 with 1.3 s intervals for 3 to 5 min, resulting in approximately 140 to 230 data points per  
138 measurement. Fluxes were estimated with function *fluxx* of package *flux* version 0.3-0  
139 (Jurasinski et al., 2014) for the R statistical software version 2.15.2 (R Core Team,  
140 2013). In short, the algorithm identifies the most linear part of the CO<sub>2</sub> concentration  
141 development during chamber placement time and fits a linear regression model (Eq.  
142 (1)):

$$143 \quad f = \frac{MpV}{RTA} \frac{dc}{dt} 10^6, \quad (1)$$

144 with  $f$  the CO<sub>2</sub> flux (g m<sup>-2</sup> h<sup>-1</sup>),  $M$  the molar mass of CO<sub>2</sub> (g mol<sup>-1</sup>),  $p$  the air pressure  
145 (Pa),  $V$  the chamber volume (m<sup>3</sup>),  $R$  the gas constant (J mol<sup>-1</sup> K<sup>-1</sup>),  $T$  the temperature

inside the chamber ( $K$ ),  $A$  the area covered by the chamber ( $\text{m}^2$ ), and  $dc/dt$  the  $\text{CO}_2$  concentration change over time ( $\text{ppm h}^{-1}$ ). The minimum proportion of data points to be kept for regression analyses was 70 % of a concentration measurement to discard data noise at the beginning and the end resulting from chamber deployment and removal (for details see help file for function *fluxx* of package *flux*). Thus, each  $\text{CO}_2$  flux was estimated at least from 98 concentration measurements. Only linear fluxes with a concentration change of at least 10 ppm, a normalised root mean square error (NRMSE)  $\leq 0.15$  and a coefficient of determination ( $R^2$ ) of at least 0.85 were included in further analyses. We assumed linearity of concentration change and did not test for non-linearity since 95.1% of the obtained linear regressions had  $R^2 \geq 0.95$ .

To obtain reference data from before tillage operations, the undisturbed site was measured hourly between 7 a.m. and 1 p.m. on 19 October 2012 (i.e. between harvest and tillage). The intervals between measurements before, during and after tillage operations were varied to effectively capture the development of  $\text{CO}_2$ . The measurements immediately after the tillage operations were conducted within one minute by inserting the collars and putting on the airtight chambers. The timeline (24 till 29 October) of tillage events, soil samplings and the respective  $\text{CO}_2$  measurements, together with soil temperature, is shown in Fig. 1. After this period,  $\text{CO}_2$  measurements were performed hourly before noon on 1, 5 and 9 November.

## 2.3 Soil sampling and analyses

Three replicates of bulk soil samples were taken at 5 – 15 cm depth with soil sample rings ( $V = 250 \text{ cm}^3$ ) in a triangular arrangement between the three collars for gas sampling (see 2.2) in each treatment at three dates: 1) right before the first tillage operation, 2) in the afternoon after the second tillage operation and 3) four days after the second tillage operation. The resulting 27 soil samples were fixed immediately with liquid nitrogen and splitted thereafter into subsamples for freeze-drying and for oven-drying at  $60^\circ \text{C}$ .

For Pyrolysis-field ionization mass spectrometry (Py-FIMS), about 5 milligrams of the freeze-dried, ground and homogenized samples were thermally degraded in the ion

source (emitter: 4.7 kV, counter electrode -5.5 kV) of a double-focusing Finnigan MAT 95 mass spectrometer (Finnigan, Bremen, Germany). The samples were heated in a vacuum of  $10^{-4}$  Pa from 50 °C to 700 °C, in temperature steps of 10 °C over a time period of 15 minutes. Between magnetic scans the emitter was flash heated to avoid residues of pyrolysis products. The Py-FIMS mass spectra of each sample were gained by the integration of 65 single scans in a mass range of 15 – 900  $m/z$ . Ion intensities were referred to 1 mg of the sample. Volatile matter was calculated as mass loss in percentage of sample weight. The three replicates of each sample were then averaged to one final survey spectrum. Moreover, thermograms were compiled for the total ion intensities. The assignment of marker signals to chemical compounds from the survey spectra were interpreted according to Leinweber et al. (2013) to obtain the relative abundance of ten SOM compound classes: 1) carbohydrates, 2) phenols and lignin monomers, 3) lignin dimers, 4) lipids, alkanes, alkenes, bound fatty acids and alkyl monoesters, 5) alkylaromatics, 6) mainly heterocyclic N-containing compounds, 7) sterols, 8) peptides, 9) suberin, and 10) free fatty acids.

Subsamples of oven-dried and sieved soil (2 mm) were used for determination of total and hot water-extracted C and N. For determination of total C and N, 1 g of ground soil was analysed with a vario Max CN Element Analyzer (elementar Analysensysteme GmbH, Hanau, Germany) based on high temperature combustion at up to 1200 °C with subsequent gas analysis. For hot-water extraction, 20 g soil was boiled in 40 ml deionized water for 60 minutes (Leinweber et al., 1995). After filtration with pleated filter (240 mm, 80 g m<sup>-2</sup>) by Munktell (Falun, Sweden), extracts were analysed with a DIMATOC 2000 (DIMATEC Analysentechnik GmbH, Essen, Germany) for determination of hot-water extractable organic C (HWC) and total nitrogen bound (HWN). These measurements of organic C and total nitrogen bound are based on the principle of thermal-catalytic oxidation with subsequent NDIR detection and the principle of chemiluminescence, respectively. For each sample, two replicates were analysed and results were averaged for further calculations.

## 2.4 Statistical analyses

All statistical analyses were run using R 2.15.2 (R Core Team, 2013). The cumulated

205 CO<sub>2</sub> effluxes were estimated by a bootstrap method with the function *auc.mc* of the R  
206 package *flux* version 0.3-0 (Jurasinski et al., 2014). In detail, the CO<sub>2</sub> fluxes were  
207 cumulated in 250 iterations, while for each run 25 fluxes were omitted randomly for the  
208 period after tillage. For the reference period before tillage, in each iteration run 4 fluxes  
209 were omitted randomly. The numbers of randomly omitted fluxes per run correspond  
210 roughly to one fifth of the recorded fluxes per treatment in the respective periods. The  
211 resulting data were used to calculate means and standard deviations. Tukey's HSD test  
212 was applied to test for differences in means of CO<sub>2</sub> fluxes as well as of HWC and HWN  
213 between sampling periods and treatments against a significance level of  $\alpha < 0.05$ . Py-  
214 FIMS signals of the compound classes were tested for differences in means by Tukey's  
215 HSD test against a significance level of  $\alpha < 0.1$  since the number of replicates was  
216 limited and the variances rather high.

217 A principal component analysis (PCA) was applied to the mass signals with significant  
218 differences between the samples according to univariate Wilk's  $\lambda$  ( $p < 0.001$ ) with  
219 function *rda* of R package *vegan* version 2.3-0 (Oksanen et al., 2015).

220 Partial least squares regression (PLSR) was used for discrimination (Barker and Rayens,  
221 2003) to maximally explore linkages between shifts in the *m/z* data by tillage and shifts  
222 in CO<sub>2</sub> efflux. PLSR models were built by using the R package "autopls" version 1.3  
223 (Schmidtlein et al., 2015) with stepwise backward selection combined with a 10-fold  
224 cross-validation to substantially reduce the number of variables, *i.e.*, to extract the  
225 variables with the highest explanatory power. The PLSR procedure was repeated 10.000  
226 times to yield coherent results since the obtained PLSR models differed widely both in  
227 the number and in the choice of variables, thus in their predictive performance. Based  
228 on the performance index suggested by Bauwe et al. (2015), the 500 "best" models were  
229 extracted and, finally, the mass signals which were utilised more than 50 times in the  
230 latter models were chosen.

231



## 232 3 Results

### 233 3.1 Soil organic carbon, nitrogen, hot-water extractable carbon and hot- 234 water extractable nitrogen

235 One of the replicates in MF exhibited exceptionally low HWC and HWN values.  
236 According to Dixon's Q-test, these values were outlier (one-third and half, respectively,  
237 as high as for the other replicates in MF) and thus excluded from further analysis.  
238 Before tillage, the soil of all treatments had similar C and HWC contents, while the N  
239 and HWN contents were slightly higher in MF, resulting in significantly narrower C/N  
240 and HWC/HWN ratios in MF (8.55 and 5.93, respectively) compared to BD (9.03 and  
241 8.54, respectively) (Table 1). The C, N and HWC contents of all treatments were  
242 changed only slightly by tillage, but the HWN content of soil in BD increased from 0.05  
243 mg g<sup>-1</sup> (5.6 % of N) up to 0.07 mg g<sup>-1</sup> (7.4 % of N), resulting in a significant ( $p < 0.05$ )  
244 narrowing of the HWC/HWN ratio from 8.5 down to 6.0 (Table 1).

### 245 3.2 Soil CO<sub>2</sub> efflux

246 Five days before the tillage operations (19 October 2012), the mean efflux rates (all in g  
247 CO<sub>2</sub>-C m<sup>-2</sup> h<sup>-1</sup>) were 0.133 (CL), 0.192 (MF) and 0.173 (BD), with the efflux being  
248 significantly lower from CL than from the amended plots MF and BD ( $p < 0.05$ ) (Fig.  
249 2). In the morning before the first tillage operation with a disc harrow (24 October), the  
250 effluxes had similar magnitudes and proportions like five days before (CL = 0.147, MF  
251 = BD = 0.199, all in g CO<sub>2</sub>-C m<sup>-2</sup> h<sup>-1</sup>). After harrowing, CO<sub>2</sub>-effluxes increased to 0.849  
252 (CL), 0.833 (MF) and 0.479 (BD). Over the next 5.5 hours, these values declined to  
253 0.602 (CL), 0.460 (MF) and 0.276 (BD) resulting in overall mean effluxes of 0.554  
254 (CL), 0.481 (MF) and 0.344 (BD), with the latter being now significantly lower  
255 ( $p < 0.05$ ) than CL or MF during the measured period after harrowing. Directly before  
256 the second tillage operation with a reversible mouldboard plough in the morning of the  
257 following day (25 October), the mean effluxes were 0.299 (CL), 0.249 (MF) and 0.290  
258 (BD) (all in g CO<sub>2</sub>-C m<sup>-2</sup> h<sup>-1</sup>). Immediately after ploughing, they increased sharply up to  
259 2.443 (CL), 2.654 (MF) and 3.347 (BD) and declined to 0.371 (CL), 0.718 (MF) and  
260 0.223 (BD) after 4 hours, leading to overall mean effluxes of the measured period after

ploughing of CL = 1.012, MF = 1.392, and BD = 1.020. Although the mean CO<sub>2</sub> fluxes within each treatment differed significantly ( $p < 0.05$ ) from the other measured days only after ploughing (25 October), BD on average showed significantly ( $p < 0.05$ ) lower fluxes than CL or MF after tillage on 24 and 29 October (Fig. 3) as well as on 1 November (CL = 0.262, MF = 0.242, BD = 0.113, all in g CO<sub>2</sub>-C m<sup>-2</sup> h<sup>-1</sup>) and 5 November (CL = 0.331, MF = 0.316, BD = 0.074, all in g CO<sub>2</sub>-C m<sup>-2</sup> h<sup>-1</sup>).

### 3.3 Pyrolysis-Field Ionization Mass Spectroscopy

The thermograms of total ion intensity (TII) and the Py-FIMS mass spectra of the soil samples of CL and MF taken before tillage were similar whereas the ones of BD were different from those two (Fig. 4): The TII-thermograms of CL and MF had a peak at 480 °C, but BD displayed a pronounced bimodal shape with a first volatilisation maximum at about 390 °C which was less marked in CL and MF. Furthermore, the mass spectrum of BD differed distinctly from the mass spectra of MF and CL, especially in the abundance of marker signals for carbohydrates and peptides (e.g.,  $m/z$  58, 60, 84, 69, 110, 126 and 162) were lower. Apart from this the spectra are dominated by signals for lignin mono- and dimers (e.g.,  $m/z$  150, 208, 222, 244) as well as for homologous series of alkenes and alkadienes from  $n$ -C<sub>18</sub> up (e.g.,  $m/z$  252, 264/266, 278/280, 294, 308, 322, 336, 364, 392, 406) (Fig. 4).

After discriminant function analysis with Wilk's  $\lambda$ , the resulting significant relative mass signals ( $p < 0.001$ ,  $n = 67$ ) were further explored by PCA. The first two principal components explained 78.3% and 8.3% of total variance. All treatments are well separated from each other (Fig. 5), with CL mainly in the 3rd quadrant, MF mainly in the 1st and BD spanning from the 2nd to the 4th quadrant. According to this analysis, samples from MF and BD taken before the tillage events (pre) showed the largest differences in composition. The PCA separated the samples taken at different dates (pre, post and post + 4) in the treatments MF and BD, but not in CL.

Basic data of the Py-FI mass spectra and the proportions of compound classes are compiled in Table 2. Approximately 46.9% of the TII in the mass spectra could be explained by  $m/z$  signals assigned to the compound classes. Additionally, non-specific

low-mass signals and isotope peaks contributed 2.6% and 14.2%, respectively. Before tillage, the volatized matter (VM) was highest in BD although the differences in means were not significant ( $p > 0.1$ ). However, four days after tillage VM increased to 7.1% in BD and then significantly ( $p < 0.05$ ) exceeded that in MF and CL. Such an increase over time was only observed for BD, but it was not significant ( $p < 0.01$ ). In the other treatments, a temporal increase in VM occurred directly after the first tillage with disc harrow.

The relative (Table 2) and absolute (data not shown) ion intensities of the compound classes varied across treatments before tillage and changed differently after tillage. In the undisturbed soil, BD had the lowest proportions of carbohydrates, heterocyclic N-containing compounds and peptides and the highest proportions of lignin dimers, lipids, sterols, suberin and free fatty acids. CL was characterized by higher proportions of phenols and lignin monomers whereas MF ranged between BD and CL regarding the proportions of these compound classes. In BD, the relative proportions of the samples taken after tillage displayed significant ( $p < 0.1$ ) increases of carbohydrates, phenols and lignin monomers, alkylaromatics, heterocyclic N-containing compounds and peptides while lignin dimers, lipids, sterols and free fatty acids decreased. In MF, the proportion of lipids increased while carbohydrates and peptides decreased. No changes were detected in the unfertilised treatment CL. The discrimination of relative mass signals with PLSR to explain cumulated CO<sub>2</sub> efflux revealed mainly functional groups from ketones and amides, peptides, carbohydrates as well as lignin building blocks and fatty acids (Table 3).

Linear correlations were calculated to investigate relationships between HWC, HWN and soil respiration as suitable indicators of SOM dynamics (Kuzyakov, 2006; Leinweber et al., 1995) and the absolute signal counts of the compound classes (Fig. 6). The latter was derived from Table 2 by Eq. (2).

$$CII_{abs} = \frac{TII \times CII_{rel}}{100}, \quad (2)$$

with CII<sub>abs</sub> the absolute ion intensity of the respective compound class, TII the total ion intensity and CII<sub>rel</sub> the proportion of the ion intensity of the respective compound class.

319 In MF only the ion intensities for carbohydrates were positively correlated with HWC  
320 whereas in BD more compound classes correlated with the tested indicators of SOM  
321 dynamics. Here, HWC was positively correlated with the ion intensities of lignin  
322 dimers, lipids, alkylaromatics, sterols and suberin, but no such correlation was found for  
323 carbohydrates in disagreement to MF. However, HWN showed a positive correlation  
324 with carbohydrates in BD. HWN was also positively correlated to phenols, lignin  
325 monomers and heterocyclic N-containing compounds but negatively correlated to free  
326 fatty acids. CO<sub>2</sub> efflux increased with decreasing amounts of sterols and suberin in BD.

327

## 328 **4 Discussion**

### 329 **4.1 Bulk soil and hot-water extracted carbon and nitrogen**

330 The C- and HWC-contents of the treatments showed no significant differences before  
331 tillage (Tab. 1). However, the observed higher N- and HWN-contents in MF (Tab. 1)  
332 did not confirm the outcomes of other experiments with similar fertilisers. No  
333 significant differences in soil C and N were found between MF and BD in the field  
334 (Odlare et al., 2014). On the contrary, in a pot experiment with maize the soil N content  
335 was higher in the digestate than in the mineral fertiliser treatment (Bachmann et al.,  
336 2011). That study as well as the present investigation lasted for weeks and months,  
337 respectively. Therefore, the C- and N-contents obtained may not be representative for  
338 long-term effects of biogas digestate vs. mineral fertiliser.

339 The increase in HWN in BD after tillage indicates an increase of easily mineralisable  
340 organic N which probably originates from soil biomass and lysates (Ghani et al., 2003;  
341 Leinweber et al., 1995; Raich and Potter, 1995) and implies an accelerated microbial  
342 turnover of soil organic N. This seems reasonable since the microbial community is able  
343 to adjust its structure and activity relatively fast to utilise formerly protected organic  
344 matter after exposure due to disruption of aggregates by tillage (Jackson et al., 2003; La  
345 Scala et al., 2008; Mueller et al., 2014). Accordingly, Fiedler et al. (2015) observed a  
346 short-lived increase of HWC after the first of two days of several tillage operations  
347 which was not found in the present study. Most likely, we just did not detect it, because

we took no soil samples after the first day. Overall, a single amendment with biogas digestates very likely is insufficient to initiate changes in bulk soil C- and N-levels. However, the increased HWN-levels in BD can be ascribed to a tillage promoted microbial turnover of soil organic N, confirming that the hot water extracts are a particularly sensitive approach to detect early SOM changes (Haynes, 2005).

## 4.2 Soil CO<sub>2</sub> efflux

The immediate and sharp increase of CO<sub>2</sub> efflux from soils just after tillage is a well-documented response and seems to be mainly driven by the release of trapped CO<sub>2</sub> from broken up aggregates by tillage (Calderon and Jackson, 2002; Ellert and Janzen, 1999; Reicosky et al., 1997). It is commonly suggested that a few hours afterwards, waning of this physical outgassing is accompanied by an increased soil respiration due to a better substrate supply for microorganisms from disrupted aggregates as well as increased soil aeration (Schulten et al., 1997; Grandy and Robertson, 2007). The amounts of the observed fluxes are well in accordance with the findings of previous studies (e. g., Rochette and Angers, 1999) and can be explained both by the magnitude of the disturbance, i.e. soil comminution, and the fertilisation history of the soil (Schulten et al., 1997).

The smaller relative efflux from BD compared to MF and CL after tillage is remarkable since before tillage the CO<sub>2</sub> fluxes in BD were of the same magnitude as those in MF and exceeded those in CL (Fig. 2). This becomes particularly evident when one considers the relation of cumulated CO<sub>2</sub> fluxes between the treatments before (19 October) and after tillage (24 – 29 October) (Fig. 3). Before tillage, the ratio of cumulated CO<sub>2</sub> fluxes in CL : MF : BD was 1 : 1.27 : 1.21 and changed to 1 : 1.21 : 0.71 after tillage. The relatively lower CO<sub>2</sub> efflux from BD after tillage may have different reasons. On the one hand, the organic matter originating from the digestates is likely less available to soil microorganisms, i. e. more “recalcitrant”, since the most labile C has been consumed already in the biogas reactor (Thomsen et al., 2013; Möller, 2015; Wentzel et al., 2015). On the other hand, even a single application of organic amendment can increase aggregate stability (Grandy et al., 2002). Therefore, the resilience against disruption by tillage might be promoted, leading to a better

physical protection of labile soil C not contained within digestates. As a consequence, the effect of increased CO<sub>2</sub> efflux after tillage as observed in CL and MF, may have been substantially reduced by a relative shortage of labile substrate in BD that affects the above suggested increased soil respiration due to substrate supply after tillage. Furthermore, the narrower HWC/HWN ratio in BD after tillage suggests an improved N supply for soil microbes which might have enhanced their C use efficiency. Such an enhanced C use efficiency may be accompanied by decreased C losses to heterotrophic respiration as long as C availability is not limited (Schnitzer, 2001; Sinsabaugh et al., 2013). However, N addition decreased the respiration when C was limited in laboratory incubation experiments (Eberwein et al., 2015). Furthermore, Oades (1984) observed decreasing CO<sub>2</sub> fluxes from soil under N saturating conditions and dextrose amendments of 1.5 and 3 mg g<sup>-1</sup> soil in comparison to non-saturating conditions, but increased CO<sub>2</sub> fluxes after dextrose amendments  $\geq 7.5$  mg g<sup>-1</sup> soil. This supports the assumption of not limited, but rather low levels of available C in the soil of BD. Also the proportion of carbohydrates in BD derived from Py-FIMS, as discussed below, consolidates this assumption. But in fact, the HWC/HWN ratio of BD after tillage was not lower than that of MF, so, in conclusion, the above described mechanisms do not well explain why the CO<sub>2</sub> efflux was lower after tillage in BD when compared to MF.

### 4.3 Pyrolysis-Field Ionization Mass Spectroscopy and synthesis

Generally, the Py-FIMS basic data and mass spectra (Fig. 4) and the proportions of compound classes (Tab. 2) confirm published data from this method for Luvisols in terms of relatively high shares of lignin monomers, phenols and alkylaromatics (Leinweber et al., 2009). Lignin monomers and phenols might be complementarily attributed to residues of the just harvested maize. Indeed, Gregorich et al. (1996) found that these are important components of maize leaves and roots as well as the light fraction of the soil under this crop. However, the Py-FIMS data indicate differences in SOM composition between the fertilization treatments and a pronounced as well as distinct impact of tillage in the treatments MF and BD (Fig. 5).

In the spectra of samples from BD, the additional peak at 390° C in the TII-thermogram (Fig. 4) can be attributed mainly to phenols and lignin monomers which likely

408 originated from primary organic matter residues since this relatively low volatilization  
409 temperature indicates labile and fairly undecomposed organic matter (Leifeld and  
410 Lützow, 2014; Ludwig et al., 2015; Sleutel et al., 2011). It is reasonable to refer this  
411 organic matter to residues from the application of BD. The VM, which is an indicator of  
412 the SOM content (Sorge et al., 1993; Wilcken et al., 1997) but also of its stability  
413 (Ludwig et al., 2015; Leinweber and Schulten, 1995), was larger in BD before tillage  
414 than in MF and CL. This suggests a tendency to elevated SOM due to application of  
415 rather stable organic matter with biogas digestate. Its increase after tillage might be  
416 explained by a general destabilization, perhaps by an enhanced SOM turnover due to an  
417 improved microbial accessibility to relatively recalcitrant residues of BD after tillage  
418 (Dao, 1998; Dungait, et al., 2012). The temporal increase in VM directly after the first  
419 tillage with disc harrow in MF and CL may indicate a similar increased accessibility of  
420 SOM. But here, the newly available SOM has been depleted quickly by microbial  
421 respiration since the microbial community is able to respond rapidly to disturbances of  
422 arable soils (Jackson et al., 2003). In MF, this assumption is supported by the  
423 decreasing shares of carbohydrates and by significantly decreasing relative signals of  
424  $m/z$  17 and 18 (data not shown), which are assigned to ammonia and ammonium,  
425 pointing to a microbial immobilisation (Mengel, 1996). Accordingly, these two  $m/z$   
426 were also selected by the PLSR as explanatory signals for CO<sub>2</sub> efflux (Tab. 3).

427 The compound classes of BD revealed the largest proportions of lignin dimers, lipids,  
428 sterols, suberin and free fatty acids at the expense of carbohydrates, heterocyclic N-  
429 containing compounds and peptides before tillage (Tab. 2). Such a SOM composition  
430 most likely reflects the cattle manure and plant residues of the biogas feedstock and  
431 their relative depletions (amides and polysaccharides) or enrichments (lignins and long-  
432 chain aliphatic compounds) during anaerobic fermentation (Leinweber et al., 1992;  
433 Möller, 2015; van Bochove et al., 1996). The pronounced tillage effect in this treatment,  
434 obvious from the increased relative signal intensities of carbohydrates, phenols and  
435 lignin monomers, alkylaromatics, heterocyclic N-containing compounds and peptides at  
436 the expense of lignin dimers, lipids, sterols and free fatty acids following tillage (Tab.  
437 2), suggests the decomposition of lignin and the new formation of carbohydrates and  
438 peptides. This is in line with reports of lignin decomposition faster than that of the total

439 SOM (Leinweber et al., 2008b; Rasse et al., 2006; Thevenot et al., 2010). Kalbitz et al.  
 440 (2003) suggested that lignin-derived moieties and lipids are utilised by microorganisms  
 441 at low initial availability of carbohydrates, accompanied by an accumulation of the  
 442 resulting microbial metabolites like carbohydrates and peptides. This suggestion is  
 443 supported on the one hand by the effect of specific lignins on soil CO<sub>2</sub> efflux (Tab. 3)  
 444 since CO<sub>2</sub> is an indicator for microbial decomposition activity (Kuzyakov, 2006). On  
 445 the other hand, a relative increase of the signals for *m/z* 125, 167, 185 and 203 was  
 446 observed in the BD treatment (data not shown) which are assigned to the bacterial cell  
 447 wall products N-acetylmuramic acid and N-acetylmuramyl-L-alanyl-D-isoglutamine  
 448 (Bahr and Schulten, 1983). Furthermore, the build-up of heterocyclic N-containing  
 449 compounds might also imply a relative shortage of available carbohydrates since a  
 450 reduced C availability during the microbial transformation of N is suggested to promote  
 451 formation of heterocyclic N instead of N immobilisation (Follett and Schimel, 1989;  
 452 Gillespie et al., 2014; Schulten and Hempfling, 1992). The increased proportion of  
 453 lipids at the expense of carbohydrates and peptides in MF likely results from increased  
 454 heterotrophic respiration of labile substrates driven by enhanced microbial activity after  
 455 tillage (La Scala et al., 2008; Reicosky and Archer, 2007; Zakharova et al., 2014). The  
 456 minor changes in SOM compounds in CL might be a consequence of the wider  
 457 HWC/HWN ratio compared with MF since a lack of available N is known to decrease  
 458 the efficiency of microbial activity (Schnitzer, 2001; Sinsabaugh et al., 2013).

459 The positive linear correlation of HWC with lignin dimers, lipids, alkylaromatics,  
 460 sterols and suberin in BD (Fig. 6) indicates a reasonable linkage between the dynamic  
 461 organic C fraction (as indicated by HWC) and the quantity of applied biogas digestate  
 462 (as indicated by lignin dimers, lipids, alkylaromatics, sterols and suberin). At the same  
 463 time, the microorganisms in BD may have been short in available labile C since there  
 464 was no significant ( $p > 0.05$ ) correlation between HWC and carbohydrates. In contrast,  
 465 a significant and positive correlation was observed between HWC and carbohydrates in  
 466 MF (Fig. 6). This linkage was previously described by Leinweber et al. (1995) and  
 467 attributed to microbial biomass (Ghani et al., 2003) and labile soil C (Sparling et al.,  
 468 1998).



469 Interestingly, HWN correlated positively with carbohydrates in BD. Since the major  
470 part of carbohydrates in soils originate from microorganisms and their residues (Gunina  
471 and Kuzyakov, 2015), this may suggest a metabolic coupling between carbohydrates  
472 and HWN because many N-cycling processes are mediated microbially (Isobe and  
473 Ohte, 2014). This idea is supported by the negative correlation between HWN and free  
474 fatty acids, which also hints to a coupling of the dynamic N pool with microbial activity  
475 in BD. Actually, free fatty acids are known as a major carbon source during nitrogen  
476 immobilisation by microbial anabolism (Kirchmann and Lundvall, 1993).

477 In BD, the cumulated CO<sub>2</sub> efflux and the amounts of sterols were negatively correlated  
478 (Fig. 6). This supports the suggestion of Heumann et al. (2011, 2013) that sterols may  
479 have an inhibitory effect on microorganisms of the N cycle. Furthermore, Negassa et al.  
480 (2011) reported a significant inhibition of the urease activity with increasing sterol  
481 proportions in agro-industrial byproducts. Since microbial activity can affect  
482 heterotrophic soil respiration (Ryan and Law, 2005), it is likely that increased amounts  
483 of sterols as they are typically found in biogas digestates (Leinweber, 2015, unpublished  
484 Py-FIMS data) delay the decomposition and, thus, may slow down soil respiration.  
485 However, since the amounts of sterols decreased significantly after tillage in DB (Table  
486 3), the actual sterol contribution to reduced CO<sub>2</sub>-efflux in BD relative to the other  
487 treatments cannot be ascertained by the present data set. In light of the contradicting  
488 observation of increased labile N after tillage in BD, inhibitory effects of sterols as  
489 reported in the above publications may be more pronounced in undisturbed soils.

490 Our data and analyses suggest a short-term induction of an enhanced microbial N-  
491 turnover by tillage under fertilisation with biogas digestates. This is supported by the  
492 results of each of the used methods and their cross-validation, i.e., (i) HWN as an  
493 indicator for labile N increased, (ii) CO<sub>2</sub> efflux as an possible indicator for carbon use  
494 efficiency in terms of improved microbial N-availability decreased, (iii) Py-FIMS data  
495 pointing at an increase of N-containing compounds along with the decomposition of  
496 lignins, and finally, (iv) significant correlations among data sets from these methods  
497 (Fig. 6).

498 In MF, the depletion of HWC was linked to decreasing amounts of carbohydrates,  
499 certainly due to increased microbial respiration, though no significant correlation with  
500 CO<sub>2</sub> efflux was found. No modifications were detected in CL were the absence of  
501 amendment may have led to a shortage of N as indicated by the relatively high  
502 HWC/HWN-ratio which likely inhibited an enhanced microbial activity.

503

## 504 **5 Conclusions**

505 Combining Py-FIMS as a sensitive technique to detect differences and alterations of  
506 specific compound classes of SOM with classical methods like hot-water extraction and  
507 measurements of soil CO<sub>2</sub> efflux allowed us to gain a better understanding of short-term  
508 SOM turnover after tillage operations. After tillage, SOM composition changed in the  
509 temporal scale of days and the changes varied significantly under different types of  
510 amendment. Particularly obvious were the turnover of lignin-derived substances and the  
511 depletion of carbohydrates due to soil respiration. Thus, in BD, the SOM turnover was  
512 relatively fast, questioning the suggested recalcitrance of biogas digestates as stable  
513 leftovers of the anaerobic fermentation. Since we found indications for inhibitory  
514 effects of sterols on the CO<sub>2</sub> efflux, which were previously reported in three  
515 independent studies on parameters of the N-cycle, their long-term impact on SOM  
516 stocks should be examined more closely. Therefore, future investigations should  
517 address the short- and long-term turnover of SOM following various soil amendments,  
518 especially with the relatively new biogas digestates.

519

## 520 **Acknowledgements**

521 We thank the technicians Steffen Kaufmane and Sascha Tittmar for their assistance in  
522 field work and the research facility for agriculture and fisheries of the federal state of  
523 Mecklenburg-Western Pomerania (LFA) in Gülzow for their co-operation, especially  
524 Jana Peters and Andreas Gurgel. The joint research project underlying this report was  
525 funded by the German Federal Ministry of Food and Agriculture (funding identifier  
526 22007910). Py-FIMS analyses in the Mass Spectrometry Laboratory of Soil Science

527 were funded by the “Exzellenzförderprogramm” of the Ministry of Education, Science  
528 and Culture, federal state of Mecklenburg-Vorpommern (Project UR 07 079) as well as  
529 by the German Federal Ministry of Food and Agriculture (funding identifier 22400112).  
530

531 **References**

- 532 Alvarez, R., Alvarez, C. R., and Lorenzo, G.: Carbon dioxide fluxes following tillage  
533 from a mollisol in the Argentine Rolling Pampa, *European Journal of Soil*  
534 *Biology*, 37, 161–166, doi:10.1016/S1164-5563(01)01085-8, 2001.
- 535 Bachmann, S., Wentzel, S., and Eichler-Löbermann, B.: Codigested dairy slurry as a  
536 phosphorus and nitrogen source for *Zea mays* L. and *Amaranthus cruentus* L,  
537 *Journal of Plant Nutrition and Soil Science*, 174, 908–915,  
538 doi:10.1002/jpln.201000383, 2011.
- 539 Bahr, U. and Schulten, H.-R.: Pyrolysis field ionization mass spectrometry of cell wall  
540 components and bacterial cell walls, *Journal of Analytical and Applied*  
541 *Pyrolysis*, 5, 27–37, doi:10.1016/0165-2370(83)80011-4, 1983.
- 542 Balesdent, J., Mariotti, A., and Boissgonier, D.: Effect of tillage on soil organic carbon  
543 mineralization estimated from <sup>13</sup>C abundance in maize fields, *Journal of Soil*  
544 *Science*, 41, 587–596, doi:10.1111/j.1365-2389.1990.tb00228.x, 1990.
- 545 Balota, E. L., Colozzi-Filho, A., Andrade, D. S., and Dick, R. P.: Microbial biomass in  
546 soils under different tillage and crop rotation systems, *Biology and Fertility of*  
547 *Soils*, 38, 15–20, doi:10.1007/s00374-003-0590-9, 2003.
- 548 Barker, M. and Rayens, W.: Partial least squares for discrimination, *J. Chemometrics*,  
549 17, 166–173, doi:10.1002/cem.785, 2003.
- 550 Bauwe, A., Jurasinski, G., Scharnweber, T., Schröder, C., and Lennartz, B.: Impact of  
551 climate change on tree-ring growth of Scots pine, common beech and  
552 pedunculate oak in northeastern Germany, *iForest*, 9, 1–11,  
553 doi:10.3832/ifor1421-008, 2015.
- 554 Calderon, F. J. and Jackson, L. E.: Rototillage, disking, and subsequent irrigation:  
555 Effects on soil nitrogen dynamics, microbial biomass, and carbon dioxide efflux,  
556 *Journal of Environmental Quality*, 31, 752–758, 2002.

557 Dao, T. H.: Tillage and crop residue effects on carbon dioxide evolution and carbon  
558 storage in a Paleustoll, Soil Science Society of America Journal, 62, 250–256,  
559 1998.

560 Doran, J. W.: Soil Microbial and Biochemical Changes Associated with Reduced  
561 Tillage: Soil Science Society of America Journal, 44, 765–771,  
562 doi:10.2136/sssaj1980.03615995004400040022x, 1980.

563 Doran, J. W.: Soil health and global sustainability: translating science into practice: Soil  
564 Health as an Indicator of Sustainable Management, Agriculture, Ecosystems &  
565 Environment, 88, 119–127, doi:10.1016/S0167-8809(01)00246-8, 2002.

566 Dungait, J. A. J., Hopkins, D. W., Gregory, A. S., and Whitmore, A. P.: Soil organic  
567 matter turnover is governed by accessibility not recalcitrance, Global Change  
568 Biology, 18, 1781–1796, doi:10.1111/j.1365-2486.2012.02665.x, 2012.

569 Eberwein, J. R., Oikawa, P. Y., Allsman, L. A., and Jenerette, G. D.: Carbon  
570 availability regulates soil respiration response to nitrogen and temperature, Soil  
571 Biology and Biochemistry, 88, 158–164, doi:10.1016/j.soilbio.2015.05.014,  
572 2015.

573 Ellert, B. H. and Janzen, H. H.: Short-term influence of tillage on CO<sub>2</sub> fluxes from a  
574 semi-arid soil on the Canadian Prairies, Soil and Tillage Research, 50, 21–32,  
575 doi:10.1016/S0167-1987(98)00188-3, 1999.

576 Fiedler, S. R., Buczko, U., Jurasinski, G., and Glatzel, S.: Soil respiration after tillage  
577 under different fertiliser treatments – implications for modelling and balancing,  
578 Soil and Tillage Research, 150, 30–42, doi:10.1016/j.still.2014.12.015, 2015.

579 Follett, R. F. and Schimel, D. S.: Effect of Tillage Practices on Microbial Biomass  
580 Dynamics, 1091 pp., doi:10.2136/sssaj1989.03615995005300040018x, 1989.

581 Franzluebbers, A. J., Hons, F. M., and Zuberer, D. A.: Seasonal changes in soil  
582 microbial biomass and mineralizable c and n in wheat management systems, Soil  
583 Biology and Biochemistry, 26, 1469–1475, doi:10.1016/0038-0717(94)90086-8,  
584 1994.

- 585 Ghani, A., Dexter, M., and Perrott, K. W.: Hot-water extractable carbon in soils: a  
586 sensitive measurement for determining impacts of fertilisation, grazing and  
587 cultivation, *Soil Biology and Biochemistry*, 35, 1231–1243, doi:10.1016/S0038-  
588 0717(03)00186-X, 2003.
- 589 Gillespie, A. W., Diochon, A., Ma, B. L., Morrison, M. J., Kellman, L., Walley, F. L.,  
590 Regier, T. Z., Chevrier, D., Dynes, J. J., and Gregorich, E. G.: Nitrogen input  
591 quality changes the biochemical composition of soil organic matter stabilized in  
592 the fine fraction: a long-term study, *Biogeochemistry*, 117, 337–350,  
593 doi:10.1007/s10533-013-9871-z, 2014.
- 594 Grandy, A. S., Porter, G. A., and Erich, M. S.: Organic Amendment and Rotation Crop  
595 Effects on the Recovery of Soil Organic Matter and Aggregation in Potato  
596 Cropping Systems, *Soil Science Society of America Journal*, 66,  
597 doi:10.2136/sssaj2002.1311, 2002.
- 598 Grandy, A. S. and Robertson, G.: Land-Use Intensity Effects on Soil Organic Carbon  
599 Accumulation Rates and Mechanisms, *Ecosystems*, 10, 59–74,  
600 doi:10.1007/s10021-006-9010-y, 2007.
- 601 Grandy, A. S. and Neff, J. C.: Molecular C dynamics downstream: The biochemical  
602 decomposition sequence and its impact on soil organic matter structure and  
603 function, *Science of The Total Environment*, 404, 297–307,  
604 doi:10.1016/j.scitotenv.2007.11.013, 2008.
- 605 Gregorich, E. G., Monreal, C. M., Schnitzer, M., and Schulten, H. R.: Transformation  
606 of plant residues into soil organic matter: Chemical characterization of plant  
607 tissue, isolated soil fractions, and whole soils, *Soil Science*, 161, 680–693,  
608 doi:10.1097/00010694-199610000-00005, 1996.
- 609 Gunina, A. and Kuzyakov, Y.: Sugars in soil and sweets for microorganisms: Review of  
610 origin, content, composition and fate, *Soil Biology and Biochemistry*, 90, 87–  
611 100, doi:10.1016/j.soilbio.2015.07.021, 2015.

- Haynes, R. J.: Labile Organic Matter Fractions as Central Components of the Quality of Agricultural Soils: An Overview, in: *Advances in Agronomy*, Academic Press, 221–268, 2005.
- Heumann, S., Schlichting A., Boettcher, J., and Leinweber, P.: Sterols in soil organic matter in relation to nitrogen mineralization in sandy arable soils, *Journal of Plant Nutrition and Soil Science*, 174, 576–586, doi:10.1002/jpln.200900273, 2011.
- Heumann, S., Rimmer, D. L., Schlichting, A., Abbott, G. D., Leinweber, P., and Böttcher, J.: Effects of potentially inhibiting substances on C and net N mineralization of a sandy soil—a case study, *J. Plant Nutr. Soil Sci.*, 176, 35–39, doi:10.1002/jpln.201200353, 2013.
- Isobe, K. and Ohte, N.: Ecological Perspectives on Microbes Involved in N-Cycling, *Microbes and Environments*, 29, 4–16, doi:10.1264/jsme2.ME13159, 2014.
- IUSS Working Group WRB: World Reference Base for Soil Resources 2006. World Soil Resources Report No. 103. FAO, Rome, 2006
- Jackson, L. E., Calderon, F. J., Steenwerth, K. L., Scow, K. M., and Rolston, D. E.: Responses of soil microbial processes and community structure to tillage events and implications for soil quality, *Geoderma*, 114, 305–317, doi:10.1016/S0016-7061(03)00046-6, 2003.
- Jandl, G., Leinweber, P., Schulten, H.-R., and Eusterhues, K.: The concentrations of fatty acids in organo-mineral particle-size fractions of a Chernozem, *European Journal of Soil Science*, 55, 459–470, doi:10.1111/j.1365-2389.2004.00623.x, 2004.
- Jurasinski, G., Koebsch, F., Guenther, A., Beetz, S.: flux: Flux rate calculation from dynamic closed chamber measurements. R package version 0. 3-0. <http://CRAN.R-project.org/package=flux>, 2014
- Kalbitz, K., Schwesig, D., Schmerwitz, J., Kaiser, K., Haumaier, L., Glaser, B., Ellerbrock, R., and Leinweber, P.: Changes in properties of soil-derived

640 dissolved organic matter induced by biodegradation, *Soil Biology and*  
641 *Biochemistry*, 35, 1129–1142, doi:10.1016/S0038-0717(03)00165-2, 2003.

642 Kirchmann, H. and Lundvall, A.: Relationship between N immobilization and volatile  
643 fatty acids in soil after application of pig and cattle slurry: *Biology and Fertility*  
644 *of Soils, Biol Fertil Soils*, 15, 161–164, doi:10.1007/BF00361605, 1993.

645 Kuzyakov, Y.: Sources of CO<sub>2</sub> efflux from soil and review of partitioning methods, *Soil*  
646 *Biology and Biochemistry*, 38, 425–448, doi:10.1016/j.soilbio.2005.08.020,  
647 2006.

648 Kuzyakov, Y., Leinweber, P., Saponov, D., and Eckhardt, K.-U.: Qualitative  
649 assessment of rhizodeposits in non-sterile soil by analytical pyrolysis, *Journal of*  
650 *Plant Nutrition and Soil Science*, 166, 719–723, doi:10.1002/jpln.200320363,  
651 2003.

652 La Scala, N., Lopes, A., Spokas, K., Bolonhezi, D., Archer, D. W., and Reicosky, D. C.:  
653 Short-term temporal changes of soil carbon losses after tillage described by a  
654 first-order decay model, *Soil and Tillage Research*, 99, 108–118,  
655 doi:10.1016/j.still.2008.01.006, 2008.

656 Leifeld, J. and Lützw, M. von: Chemical and microbial activation energies of soil  
657 organic matter decomposition, *Biology and Fertility of Soils*, 50, 147–153,  
658 doi:10.1007/s00374-013-0822-6, 2014.

659 Leinweber, P., Schulten, H.-R., and Horte, C.: Differential thermal analysis,  
660 thermogravimetry and pyrolysis-field ionisation mass spectrometry of soil  
661 organic matter in particle-size fractions and bulk soil samples, *Thermochimica*  
662 *Acta*, 194, 175–187, doi:10.1016/0040-6031(92)80016-P, 1992.

663 Leinweber, P. and Schulten, H. R.: Composition, stability and turnover of soil organic  
664 matter: investigations by off-line pyrolysis and direct pyrolysis-mass  
665 spectrometry, *Journal of Analytical and Applied Pyrolysis*, 32, 91–110,  
666 doi:10.1016/0165-2370(94)00832-L, 1995.



- 667     Leinweber, P., Schulten, H. R., and Korschens, M.: Hot-water extracted organic-matter-  
668             chemical-composition and temporal variations in a long-term field experiment,  
669             *Biology and Fertility of Soils*, 20, 17–23, doi:10.1007/BF00307836, 1995.
- 670     Leinweber, P., Eckhardt, K.-U., Fischer, H., and Kuzyakov, Y.: A new rapid micro-  
671             method for the molecular-chemical characterization of rhizodeposits by field-  
672             ionization mass spectrometry, *Rapid Communications in Mass Spectrometry*,  
673             22, 1230–1234, doi:10.1002/rcm.3463, 2008a.
- 674     Leinweber, P., Jandl, G., Baum, C., Eckhardt, K.-U., and Kandeler, E.: Stability and  
675             composition of soil organic matter control respiration and soil enzyme activities,  
676             *Soil Biology & Biochemistry*, 40, 1496–1505,  
677             doi:10.1016/j.soilbio.2008.01.003, 2008b.
- 678     Leinweber, P., Kruse, J., Baum, C., Arcand, M., Knight, J. D., Farrell, R., Eckhardt, K.-  
679             U., Kiersch, K., and Jandl, G.: Chapter Two - Advances in Understanding  
680             Organic Nitrogen Chemistry in Soils Using State-of-the-art Analytical  
681             Techniques, in: *Advances in Agronomy*, Sparks, D. L. (Ed.), *Advances in*  
682             *Agronomy*, Academic Press, 83–151, 2013.
- 683     Liu, X., Herbert, S. J., Hashemi, A. M., Zhang, X., and Ding, G.: Effects of agricultural  
684             management on soil organic matter and carbon transformation - a review, *Plant*,  
685             *Soil and Environment*, 52, 531–543, 2006.
- 686     Ludwig, M., Achtenhagen, J., Miltner, A., Eckhardt, K.-U., Leinweber, P., Emmerling,  
687             C., and Thiele-Bruhn, S.: Microbial contribution to SOM quantity and quality in  
688             density fractions of temperate arable soils, *Soil Biology and Biochemistry*, 81,  
689             311–322, doi:10.1016/j.soilbio.2014.12.002, 2015.
- 690     Melnitchouck, A., Leinweber, P., Eckhardt, K. U., and Beese, R.: Qualitative  
691             differences between day- and night-time rhizodeposition in maize (*Zea mays* L.)  
692             as investigated by pyrolysis-field ionization mass spectrometry, *Soil Biology &*  
693             *Biochemistry*, 37, 155–162, doi:10.1016/j.soilbio.2004.06.017, 2005.
- 694     Mengel, K.: Turnover of organic nitrogen in soils and its availability to crops, *Plant and*  
695             *Soil*, 181, 83–93, doi:10.1007/BF00011295, 1996.

- 696 Mijangos, I., Pérez, R., Albizu, I., and Garbisu, C.: Effects of fertilization and tillage on  
697 soil biological parameters: Papers from the 1st International Conference on  
698 Environmental, Industrial and Applied Microbiology (BioMicroWorld-2005),  
699 Enzyme and Microbial Technology, 40, 100–106,  
700 doi:10.1016/j.enzmictec.2005.10.043, 2006.
- 701 Möller, K.: Effects of anaerobic digestion on soil carbon and nitrogen turnover, N  
702 emissions, and soil biological activity. A review: Agronomy for Sustainable  
703 Development, Agron. Sustain. Dev., 35, 1021–1041, doi:10.1007/s13593-015-  
704 0284-3, 2015.
- 705 Mueller, C. W., Gutsch, M., Kothieringer, K., Leifeld, J., Rethemeyer, J.,  
706 Brueggemann, N., and Kögel-Knabner, I.: Bioavailability and isotopic  
707 composition of CO<sub>2</sub> released from incubated soil organic matter fractions, Soil  
708 Biology and Biochemistry, 69, 168–178, doi:10.1016/j.soilbio.2013.11.006,  
709 2014.
- 710 Negassa, W., Baum, C., and Leinweber, P.: Soil amendment with agro-industrial  
711 byproducts: molecular-chemical compositions and effects on soil biochemical  
712 activities and phosphorus fractions, Z. Pflanzenernähr. Bodenk., 174, 113–120,  
713 doi:10.1002/jpln.201000034, 2011.
- 714 Oades, J. M.: Soil organic matter and structural stability: mechanisms and implications  
715 for management, Plant Soil, 76, 319–337, doi:10.1007/BF02205590, 1984.
- 716 Odlare, M., Pell, M., Arthurson, J. V., Abubaker, J., and Nehrenheim, E.: Combined  
717 mineral N and organic waste fertilization - effects on crop growth and soil  
718 properties, JOURNAL OF AGRICULTURAL SCIENCE, 152, 134–145,  
719 doi:10.1017/S0021859612001050, 2014.
- 720 Ohkubo, S., Iwata, Y., and Hirota, T.: Influence of snow-cover and soil-frost variations  
721 on continuously monitored 5CO<sub>2</sub> flux from agricultural land, Agricultural and  
722 Forest Meteorology, 165, 25–34, doi:10.1016/j.agrformet.2012.06.012, 2012.
- 723 Oksanen, J., Guillaume Blanchet, F., Kindt, R., Legendre, P., Minchin, P. R., O'Hara, R.  
724 B., Simpson, G. L., Solymos, P., Stevens, M. H. H., and Wagner, H.: vegan:

725 Community Ecology Package. R package version 2.3-0. [http://CRAN.R-](http://CRAN.R-project.org/package=vegan)  
726 [project.org/package=vegan](http://CRAN.R-project.org/package=vegan), 2015

727 R Core Team: R: A language and environment for statistical computing. R Foundation  
728 for Statistical Computing, Vienna, Austria, <http://www.R-project.org>, 2013

729 Raich, J. W. and Potter, C. S.: Global patterns of carbon dioxide emissions from soils,  
730 *Global Biogeochemical Cycles*, 9, 23–36, doi:10.1029/94GB02723, 1995.

731 Rasse, D. P., Dignac, M.-F., Bahri, H., Rumpel, C., Mariotti, A., and Chenu, C.: Lignin  
732 turnover in an agricultural field: from plant residues to soil-protected fractions,  
733 *European Journal of Soil Science*, 57, 530–538, doi:10.1111/j.1365-  
734 2389.2006.00806.x, 2006.

735 Reicosky, D. and Archer, D.: Moldboard plow tillage depth and short-term carbon  
736 dioxide release, *Soil and Tillage Research*, 94, 109–121,  
737 doi:10.1016/j.still.2006.07.004, 2007.

738 Reicosky, D. C., Dugas, W. A., and Torbert, H. A.: Tillage-induced soil carbon dioxide  
739 loss from different cropping systems, *Soil and Tillage Research*, 41, 105–118,  
740 doi:10.1016/S0167-1987(96)01080-X, 1997.

741 Rochette, P. and Angers, D. A.: Soil surface carbon dioxide fluxes induced by spring,  
742 summer, and fall moldboard plowing in a sandy loam, *Soil Science Society of*  
743 *America Journal*, 63, 621–628, 1999.

744 Ryan, M. G. and Law, B. E.: Interpreting, measuring, and modeling soil respiration,  
745 *Biogeochemistry*, 73, 3–27, doi:10.1007/s10533-004-5167-7, 2005.

746 Schmidt, L., Warnstorff, K., Dörfel, H., Leinweber, P., Lange, H., and Merbach, W.:  
747 The influence of fertilization and rotation on soil organic matter and plant yields  
748 in the long-term Eternal Rye trial in Halle (Saale), Germany, *Journal of Plant*  
749 *Nutrition and Soil Science*, 163, 639–648, doi:10.1002/1522-  
750 2624(200012)163:6<639:AID-JPLN639>3.0.CO;2-L, 2000.

- 751 Schmidtlein, S., Feilhauer, H., and Bruehlheide, H.: Mapping plant strategy types using  
752 remote sensing, *Journal of Vegetation Science*, 23, 365–405,  
753 doi:10.1111/j.1654-1103.2011.01370.x, 2012.
- 754 Schnitzer, M.: The in situ analysis of organic matter in soils, *Canadian Journal of Soil*  
755 *Science*, 81, 249–254, doi:10.4141/S00-064, 2001.
- 756 Schulten, H.-R. and Hempfling, R.: Influence of agricultural soil management on humus  
757 composition and dynamics: Classical and modern analytical techniques, *Plant*  
758 *and Soil*, 142, 259–271, doi:10.1007/BF00010971, 1992.
- 759 Schulten, H.-R., Sorge-Lewin, C., and Schnitzer, M.: Structure of "unknown" soil  
760 nitrogen investigated by analytical pyrolysis, *Biology and Fertility of Soils*, 24,  
761 249–254, doi:10.1007/s003740050239, 1997.
- 762 Schulten, H. R., Leinweber, P., and Jandl, G.: Analytical pyrolysis of humic substances  
763 and dissolved organic matter in water, in: *Refractory organic substances in the*  
764 *environment*, Frimmel, F. H., Abbt-Braun, G., Heumann, K. G., Hock, B.,  
765 Lüdemann, H.-D., and Spiteller, M. (Eds.), John Wiley & Sons, 163–187, 2008.
- 766 Sinsabaugh, R. L., Manzoni, S., Moorhead, D. L., and Richter, A.: Carbon use  
767 efficiency of microbial communities: stoichiometry, methodology and  
768 modelling, *Ecol Lett*, 16, 930–939, doi:10.1111/ele.12113, 2013.
- 769 Six, J., Elliott, E. T., and Paustian, K.: Aggregate and soil organic matter dynamics  
770 under conventional and no-tillage systems, *Soil Science Society of America*  
771 *Journal*, 63, 1350–1358, 1999.
- 772 Sleutel, S., Leinweber, P., van Ranst, E., Kader, M. A., and Jegajeevagan, K.: Organic  
773 Matter in Clay Density Fractions from Sandy Cropland Soils with Differing  
774 Land-Use History, 75, 521–532:  
775 <https://dl.sciencesocieties.org/publications/sssaj/abstracts/75/2/521>, last access:  
776 16 September 2014, 2011.
- 777 Sorge, C., Müller, R., Leinweber, P., and Schulten, H.-R.: Pyrolysis-mass spectrometry  
778 of whole soils, soil particle-size fractions, litter materials and humic substances:  
779 statistical evaluation of sample weight, residue, volatilized matter and total ion

780 intensity, Fresenius' Journal of Analytical Chemistry, 346, 697–703,  
781 doi:10.1007/BF00321275, 1993.

782 Sparling, G., Vojvodic-Vukovic, M., and Schipper, L. A.: Hot-water-soluble C as a  
783 simple measure of labile soil organic matter: the relationship with microbial  
784 biomass C, Soil Biology and Biochemistry, 30, 1469–1472, doi:10.1016/S0038-  
785 0717(98)00040-6, 1998.

786 Thevenot, M., Dignac, M.-F., and Rumpel, C.: Fate of lignins in soils: A review, Soil  
787 Biology and Biochemistry, 42, 1200–1211, doi:10.1016/j.soilbio.2010.03.017,  
788 2010.

789 Thomsen, I. K., Olesen, J. E., Møller, H. B., Sørensen, P., and Christensen, B. T.:  
790 Carbon dynamics and retention in soil after anaerobic digestion of dairy cattle  
791 feed and faeces, Soil Biology and Biochemistry, 58, 82–87,  
792 doi:10.1016/j.soilbio.2012.11.006, 2013.

793 van Bochove, E., Couillard, D., Schnitzer, M., and Schulten, H.-R.: Pyrolysis-Field  
794 Ionization Mass Spectrometry of the Four Phases of Cow Manure Composting,  
795 Soil Sci. Soc. Am. J., 60, 1781–1786,  
796 doi:10.2136/sssaj1996.03615995006000060024x, 1996.

797 Wentzel, S., Schmidt, R., Piepho, H.-P., Semmler-Busch, U., and Joergensen, R. G.:  
798 Response of soil fertility indices to long-term application of biogas and raw  
799 slurry under organic farming, Applied Soil Ecology, 96, 99–107,  
800 doi:10.1016/j.apsoil.2015.06.015, 2015.

801 Wilcken, H., Sorge, C., and Schulten, H. R.: Molecular composition and chemometric  
802 differentiation and classification of soil organic matter in Podzol B-horizons,  
803 Geoderma, 76, 193–219, doi:10.1016/S0016-7061(96)00107-3, 1997.

804 Zakharova, A., Midwood, A. J., Hunt, J. E., Graham, S. L., Artz, R. R. E., Turnbull, M.  
805 H., Whitehead, D., and Millard, P.: Loss of labile carbon following soil  
806 disturbance determined by measurement of respired  $\delta^{13}\text{C}\text{O}_2$ , Soil Biology and  
807 Biochemistry, 68, 125–132, doi:10.1016/j.soilbio.2013.10.001, 2014.

808 Table 1. Means and standard deviations of soil organic carbon (C), nitrogen (N), C/N ratio, hot-water extractable carbon (HWC) and  
809 nitrogen (HWN) and HWC/HWN ratio before and after tillage. Different letters in each column indicate significant differences (Tukey's  
810 HSD test,  $p < 0.05$ ) in means. Additionally, significant changes within a treatment (BD, biogas digestate; MF, mineral fertiliser; CL,  
811 control) are highlighted in bold.

| Treatment | Date     | C (mg g <sup>-1</sup> ) | N (mg g <sup>-1</sup> ) | C/N                     | HWC (mg g <sup>-1</sup> ) | HWN (mg g <sup>-1</sup> )  | HWC/HWN                      |
|-----------|----------|-------------------------|-------------------------|-------------------------|---------------------------|----------------------------|------------------------------|
| BD        | Pre      | 8.4 ± 0.0               | 0.9 ± 0.0 <sup>b</sup>  | 9.0 ± 0.1 <sup>a</sup>  | 0.44 ± 0.02               | 0.05 ± 0.00 <sup>bc</sup>  | <b>8.5 ± 0.1<sup>a</sup></b> |
|           | Post     | 8.5 ± 0.1               | 1.0 ± 0.0 <sup>ab</sup> | 8.8 ± 0.3 <sup>ab</sup> | 0.44 ± 0.03               | 0.07 ± 0.01 <sup>ab</sup>  | <b>6.1 ± 0.4<sup>b</sup></b> |
|           | Post + 4 | 8.4 ± 0.0               | 1.0 ± 0.0 <sup>ab</sup> | 8.7 ± 0 <sup>ab</sup>   | 0.40 ± 0.02               | 0.07 ± 0.01 <sup>abc</sup> | <b>6.0 ± 0.4<sup>b</sup></b> |
| MF        | Pre      | 8.7 ± 0.3               | 1.0 ± 0.0 <sup>a</sup>  | 8.5 ± 0.2 <sup>b</sup>  | 0.44 ± 0.05               | 0.08 ± 0.00 <sup>ab</sup>  | 5.9 ± 0.8 <sup>b</sup>       |
|           | Post     | 8.5 ± 0.3               | 1.0 ± 0.0 <sup>ab</sup> | 8.5 ± 0.1 <sup>b</sup>  | 0.42 ± 0.04               | 0.09 ± 0.02 <sup>a</sup>   | 4.9 ± 0.7 <sup>b</sup>       |
|           | Post + 4 | 8.6 ± 0.3               | 1.0 ± 0.0 <sup>a</sup>  | 8.5 ± 0.2 <sup>b</sup>  | 0.39 ± 0.00               | 0.07 ± 0.01 <sup>abc</sup> | 5.5 ± 0.5 <sup>b</sup>       |
| CL        | Pre      | 8.5 ± 0.2               | 1.0 ± 0.0 <sup>ab</sup> | 8.8 ± 0.2 <sup>ab</sup> | 0.50 ± 0.10               | 0.06 ± 0.02 <sup>abc</sup> | 8.9 ± 1.3 <sup>a</sup>       |
|           | Post     | 8.6 ± 0.2               | 1.0 ± 0.0 <sup>ab</sup> | 8.8 ± 0 <sup>ab</sup>   | 0.48 ± 0.04               | 0.06 ± 0.01 <sup>bc</sup>  | 8.8 ± 0.8 <sup>a</sup>       |
|           | Post + 4 | 8.5 ± 0.0               | 1.0 ± 0.0 <sup>ab</sup> | 8.7 ± 0.1 <sup>ab</sup> | 0.40 ± 0.03               | 0.04 ± 0.00 <sup>c</sup>   | 9.6 ± 0.3 <sup>a</sup>       |

812 Table 2. Total ion intensity (TII), percentage of matter volatilised in pyrolysis (VM), and relative contribution of soil organic matter  
813 compound classes to the TII as detected by Py-FIMS in the treatments (CL, control; MF, mineral fertiliser; BD, biogas digestate) close  
814 before (Pre) and after tillage (Post) and also four days after tillage (Post + 4) with standard deviations. Different letters in a column of each  
815 treatment indicate significant differences (Tukey's HSD test,  $p < 0.1$ ) in means of the different dates towards tillage. Additionally,  
816 treatments with significant changes are highlighted in bold.

| Treatment | Date     | TII ( $10^6$ counts $\text{mg}^{-1}$ ) | VM (%)                                      | Relative proportions of compound classes (% TII)* |                                               |               |                                              |                |                                             |                                             |                                              |               |                                             |                                               |
|-----------|----------|----------------------------------------|---------------------------------------------|---------------------------------------------------|-----------------------------------------------|---------------|----------------------------------------------|----------------|---------------------------------------------|---------------------------------------------|----------------------------------------------|---------------|---------------------------------------------|-----------------------------------------------|
|           |          |                                        |                                             | CHYDR                                             | PHLM                                          | LDIM          | LIPID                                        | ALKYL          | NCOMP                                       | STEROL                                      | PEPTI                                        | SUBER         | FATTY                                       | Sum                                           |
| BD        | Pre      | 44.3 $\pm$ 11.5                        | 5.2 $\pm$ 1.3                               | <b>3.7 <math>\pm</math> 1.8<sup>a</sup></b>       | <b>9.8 <math>\pm</math> 3.8<sup>a</sup></b>   | 3.4 $\pm$ 1.4 | <b>5.3 <math>\pm</math> 1.0<sup>a</sup></b>  | 11.9 $\pm$ 1.2 | <b>1.8 <math>\pm</math> 0.8<sup>a</sup></b> | <b>1.6 <math>\pm</math> 0.7<sup>a</sup></b> | <b>4.3 <math>\pm</math> 1.2<sup>a</sup></b>  | 0.1 $\pm$ 0.1 | <b>0.5 <math>\pm</math> 0.2<sup>a</sup></b> | <b>42.3 <math>\pm</math> 5.4<sup>a</sup></b>  |
|           | Post     | 40.3 $\pm$ 19.3                        | 4.7 $\pm$ 1.3                               | <b>5.6 <math>\pm</math> 0.3<sup>ab</sup></b>      | <b>13.3 <math>\pm</math> 0.8<sup>ab</sup></b> | 2.5 $\pm$ 0.4 | <b>4.1 <math>\pm</math> 0.1<sup>b</sup></b>  | 12.5 $\pm$ 0.7 | <b>2.8 <math>\pm</math> 0.2<sup>b</sup></b> | <b>0.7 <math>\pm</math> 0.2<sup>b</sup></b> | <b>5.5 <math>\pm</math> 0.3<sup>ab</sup></b> | 0 $\pm$ 0.1   | <b>0.2 <math>\pm</math> 0.1<sup>b</sup></b> | <b>47.3 <math>\pm</math> 0.9<sup>ab</sup></b> |
|           | Post + 4 | 35.1 $\pm$ 3.0                         | 7.1 $\pm$ 1.2                               | <b>6.2 <math>\pm</math> 0.3<sup>b</sup></b>       | <b>14.4 <math>\pm</math> 0.3<sup>b</sup></b>  | 1.9 $\pm$ 0.2 | <b>3.9 <math>\pm</math> 0.1<sup>b</sup></b>  | 13.2 $\pm$ 0.1 | <b>3.2 <math>\pm</math> 0.2<sup>b</sup></b> | <b>0.6 <math>\pm</math> 0<sup>b</sup></b>   | <b>5.9 <math>\pm</math> 0.2<sup>b</sup></b>  | 0 $\pm$ 0     | <b>0.2 <math>\pm</math> 0<sup>b</sup></b>   | <b>49.4 <math>\pm</math> 0.7<sup>b</sup></b>  |
| MF        | Pre      | 34.2 $\pm$ 3.4                         | 3.9 $\pm$ 1.1                               | 5.6 $\pm$ 0.9                                     | 11.4 $\pm$ 0.7                                | 2.9 $\pm$ 0.4 | <b>4.6 <math>\pm</math> 0.4<sup>a</sup></b>  | 12.2 $\pm$ 0.9 | 2.7 $\pm$ 0.2                               | 1 $\pm$ 0.4                                 | 5.4 $\pm$ 0.7                                | 0 $\pm$ 0     | 0.3 $\pm$ 0.3                               | 46.0 $\pm$ 0.3                                |
|           | Post     | 39.1 $\pm$ 5.2                         | 4.6 $\pm$ 1.0                               | 4.6 $\pm$ 0.2                                     | 10.5 $\pm$ 0.6                                | 3.5 $\pm$ 0.2 | <b>5.1 <math>\pm</math> 0.1<sup>ab</sup></b> | 12.4 $\pm$ 0.3 | 2.3 $\pm$ 0.1                               | 1.2 $\pm$ 0.2                               | 4.8 $\pm$ 0.2                                | 0 $\pm$ 0     | 0.1 $\pm$ 0.1                               | 44.5 $\pm$ 0.8                                |
|           | Post + 4 | 46.5 $\pm$ 15.8                        | 4.2 $\pm$ 0.5                               | 4.3 $\pm$ 1.0                                     | 10.3 $\pm$ 1.6                                | 3.3 $\pm$ 0.5 | <b>5.4 <math>\pm</math> 0.4<sup>b</sup></b>  | 12.6 $\pm$ 0.5 | 2.2 $\pm$ 0.5                               | 1.2 $\pm$ 0.3                               | 4.5 $\pm$ 0.4                                | 0 $\pm$ 0.1   | 0.3 $\pm$ 0.1                               | 44.2 $\pm$ 2.8                                |
| CL        | Pre      | 41.5 $\pm$ 15.5                        | <b>3.6 <math>\pm</math> 0.6<sup>a</sup></b> | 5.5 $\pm$ 0.3                                     | 14.3 $\pm$ 0.4                                | 2.2 $\pm$ 0.8 | 4.3 $\pm$ 0.1                                | 13.6 $\pm$ 0.4 | 3.1 $\pm$ 0.2                               | 0.6 $\pm$ 0                                 | 5.4 $\pm$ 0.2                                | 0 $\pm$ 0     | 0.2 $\pm$ 0.2                               | 49.2 $\pm$ 0.9                                |
|           | Post     | 41.2 $\pm$ 7.8                         | <b>4.7 <math>\pm</math> 0.4<sup>b</sup></b> | 5.6 $\pm$ 0.3                                     | 14.4 $\pm$ 0.2                                | 1.8 $\pm$ 0.1 | 4.5 $\pm$ 0.2                                | 13.9 $\pm$ 0.1 | 3.1 $\pm$ 0.1                               | 0.6 $\pm$ 0.1                               | 5.4 $\pm$ 0.3                                | 0 $\pm$ 0     | 0.3 $\pm$ 0.1                               | 49.6 $\pm$ 0.6                                |
|           | Post + 4 | 47.9 $\pm$ 14.8                        | <b>3.2 <math>\pm</math> 0.5<sup>a</sup></b> | 5.6 $\pm$ 0.5                                     | 14.4 $\pm$ 0.6                                | 2.5 $\pm$ 0.8 | 4.3 $\pm$ 0                                  | 13.7 $\pm$ 0.5 | 3.1 $\pm$ 0.2                               | 0.6 $\pm$ 0.1                               | 5.3 $\pm$ 0.2                                | 0 $\pm$ 0     | 0.1 $\pm$ 0.1                               | 49.5 $\pm$ 1.3                                |

817 \*CHYDR, carbohydrates with pentose and hexose subunits; PHLM, phenols and lignin monomers; LDIM, lignin dimers; LIPID, lipids,  
818 alkanes, alkenes, bound fatty acids, and alkyl monoesters; ALKY, alkylaromatics; NCOMP, mainly heterocyclic N-containing compounds;  
819 STEROL, sterols; PEPTI, peptides; SUBER, suberin; FATTY, free fatty acids.



820 Table 3. Results of iterative partial least square regression for cumulated CO<sub>2</sub> efflux as  
821 dependent variable and *m/z* data of all treatments and sampling times as explaining  
822 variables.

| <i>m/z</i>                       | Molecule/compound class                                                                                          |
|----------------------------------|------------------------------------------------------------------------------------------------------------------|
| 17/18                            | Ammonium                                                                                                         |
| 31                               | [ <i>M+H</i> ] <sup>+</sup> of formaldehyde                                                                      |
| 34                               | H <sub>2</sub> S                                                                                                 |
| 43                               | C <sub>2</sub> H <sub>3</sub> O from ketones/amides and C <sub>3</sub> H <sub>7</sub> propyl                     |
| 46                               | Formic acid                                                                                                      |
| 55                               | C <sub>3</sub> H <sub>3</sub> O from ketones/amides                                                              |
| 57                               | C <sub>3</sub> H <sub>5</sub> O from ketones/amides and C <sub>4</sub> H <sub>9</sub> butyl                      |
| 73                               | Propanamide                                                                                                      |
| 83                               | C <sub>5</sub> H <sub>9</sub> N from peptides                                                                    |
| 85                               | C <sub>4</sub> H <sub>5</sub> O <sub>2</sub> from carbohydrates                                                  |
| 91                               | Fragment from peptides                                                                                           |
| 98/99                            | Carbohydrates                                                                                                    |
| 206, 222, 230/231, 246, 254, 258 | Lignins                                                                                                          |
| 296, 299, 337, 418, 424          | Fatty acids (C <sub>19:1</sub> , C <sub>19:0</sub> , C <sub>22:2</sub> , C <sub>28:3</sub> , C <sub>28:0</sub> ) |

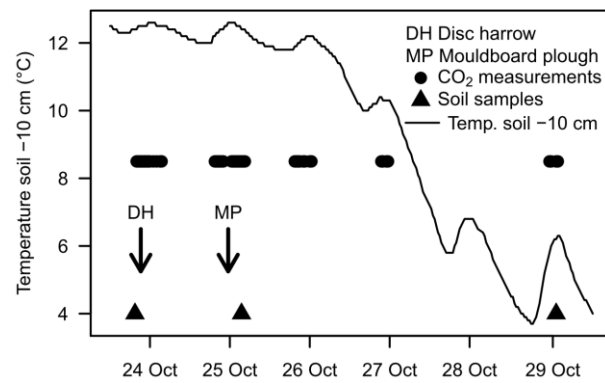

Figure 1. Timeline of the soil sampling and the CO<sub>2</sub> measurements in relation to the tillage events. Additionally, soil temperature in 10 cm depth is plotted, recorded every 30 minutes with an automated meteorological station (DALOS 535, F&C, Gülzow, Germany).

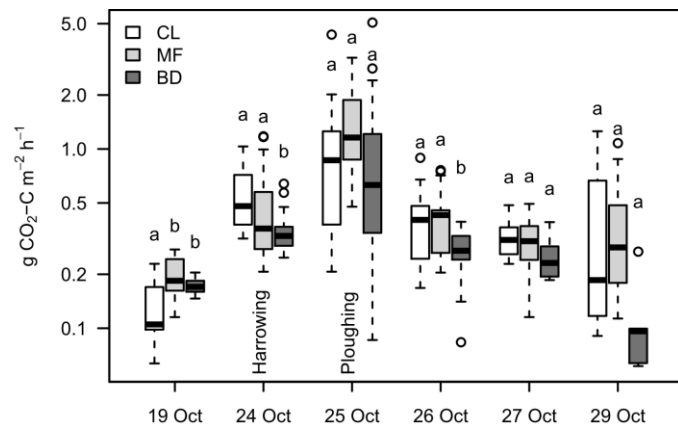

Figure 2. Soil CO<sub>2</sub> efflux and time of tillage operations (harrowing up to 10 cm depth and ploughing up to 30 cm depth). Note that for the days of tillage (24 and 25 October) only the fluxes after tillage are included in order to get a better attribution of the tillage effect. Different letters indicate significant differences (Tukey's HSD test,  $p < 0.05$ ) in mean fluxes of the treatments (CL, control; MF, mineral fertiliser; BD, biogas digestate) for each measurement day.

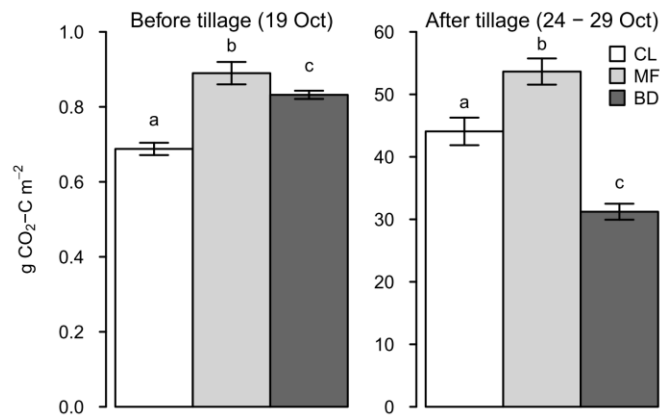

Figure 3. Cumulated soil CO<sub>2</sub> effluxes on a day before (19 October, between 7 a.m. and 1 p.m.) and the period (24 October, 7 a.m. – 29 October, 1 p.m.) tillage. Different letters indicate significant differences (Tukey's HSD test,  $p < 0.05$ ) in means of the cumulated fluxes of the treatments (CL, control; MF, mineral fertiliser; BD, biogas digestate) before and after, respectively. Error bars represent the standard deviation of interpolation by bootstrapping after 250 iteration runs.

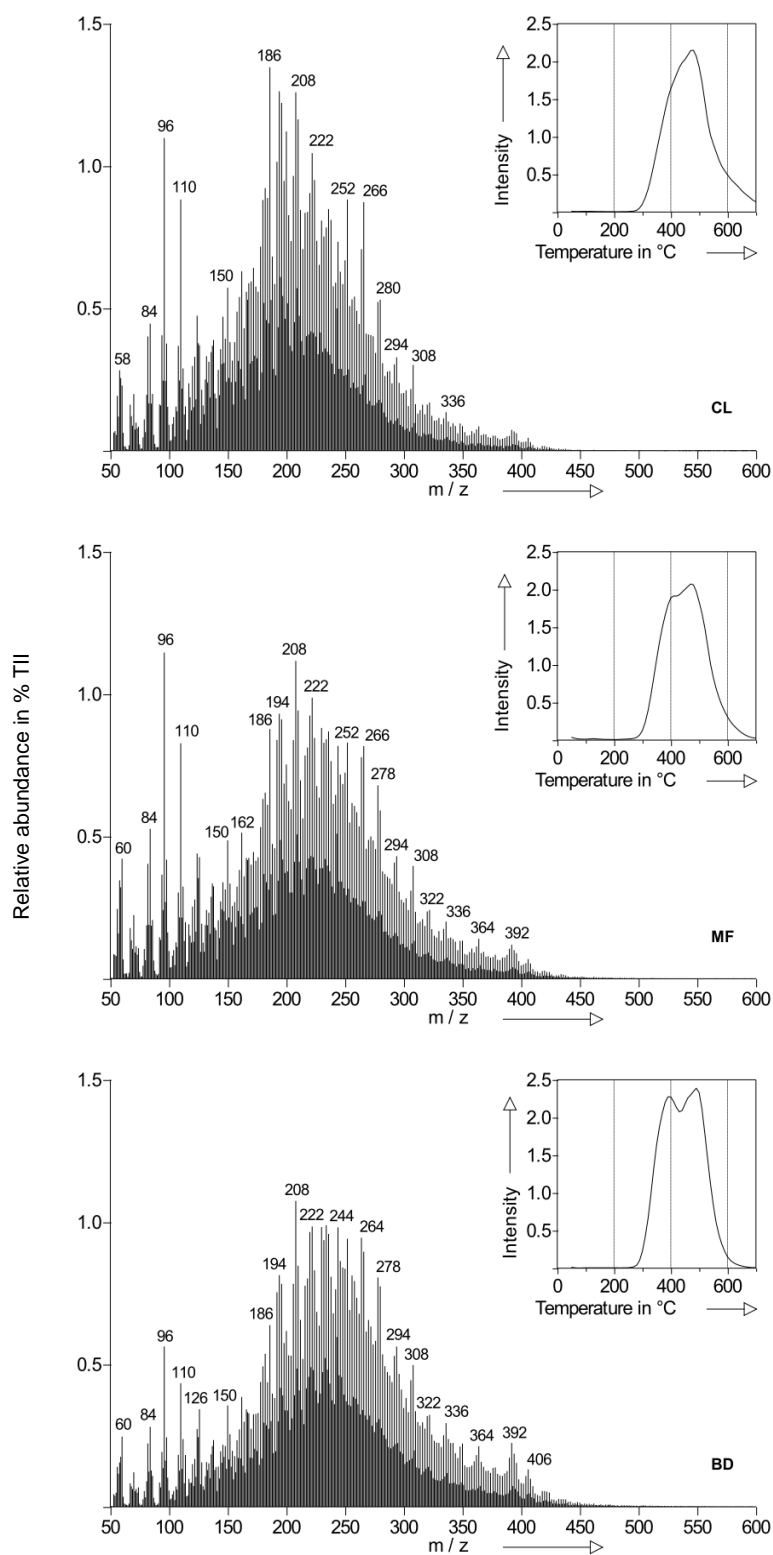

846

847 Figure 4. Thermograms of total ion intensity (TII, inserts upper right) and summed pyrolysis-  
 848 field ionization mass spectra of the treatments (CL, control; MF, mineral fertiliser; BD,  
 849 biogas digestate) before tillage.

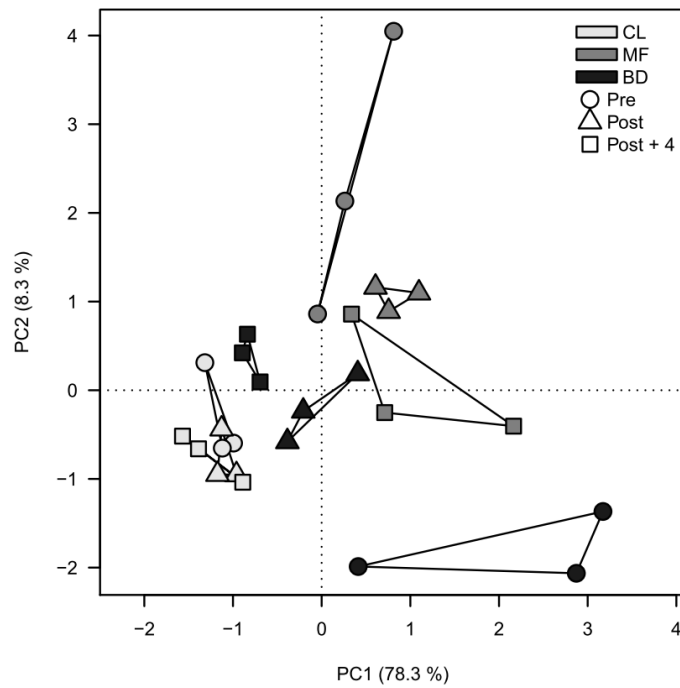

Figure 5. Principal component analysis of mass signals with significant differences according to Wilks'  $\lambda$ . Treatments (CL, control; MF, mineral fertiliser; BD, biogas digestate) and sampling times (pre-tillage, post-tillage and post-tillage + 4 days) are depicted by different colours and symbols, respectively. Since the areas integrated by the corresponding three sampling points do not overlap for the fertilised treatments, significant distinctions and changes of relative SOM composition can be assumed before and after tillage, respectively.

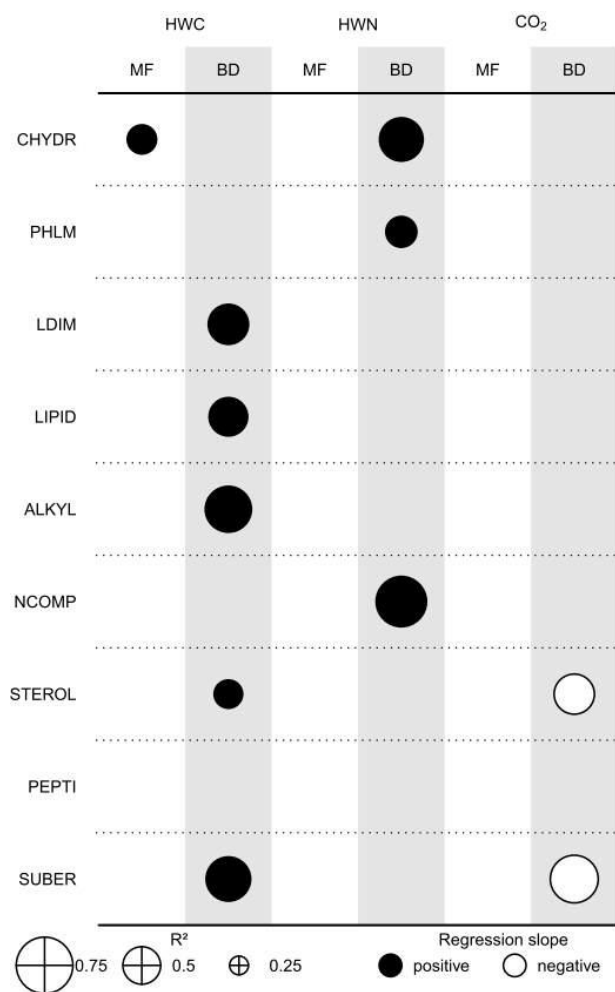

Figure 6. Significant ( $p < 0.05$ ) linear correlations between absolute signal counts of the compound classes and hot-water extractable carbon (HWC), hot-water extractable nitrogen (HWN) and soil respiration (CO<sub>2</sub>), respectively, with the corresponding coefficients of determination (R<sup>2</sup>) and direction of regression slopes, derived from the three soil sampling dates. No significant correlations were observed for CL and thus omitted in the figure.
